# Supplementary material for: Label-free on chip quality assessment of cellular blood products using real-time deformability cytometry
Source: Royal Society of Chemistry journal article supplement (doi:10.1039/d0lc00258e), 2020-01-01
Supplement: d0lc00258e1.pdf [file d0lc00258e1.pdf]

## Supplementary figures

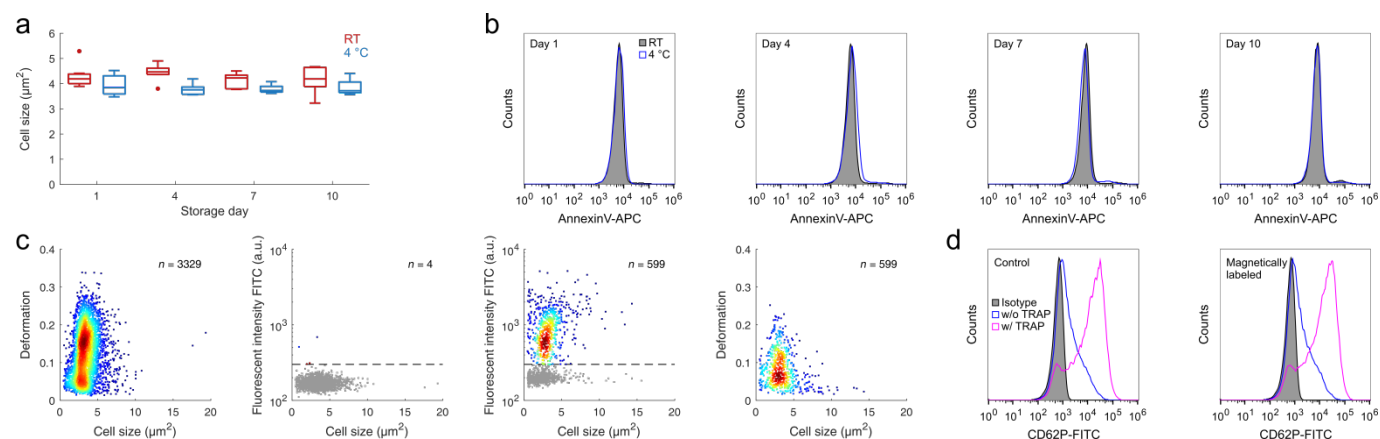

**Figure S1.** (a) Cell size, (b) histograms of annexin-V-binding of RT and 4 °C stored PC during 10 days storage, (c) deformation (left) and CD62P-FITC fluorescence intensity (center left) of control platelets and activated platelets (center right and right), (d) flow cytometry histograms of CD62P-FITC of control and magnetically labelled platelets. FITC=fluorescein isothiocyanate, RT=room temperature.

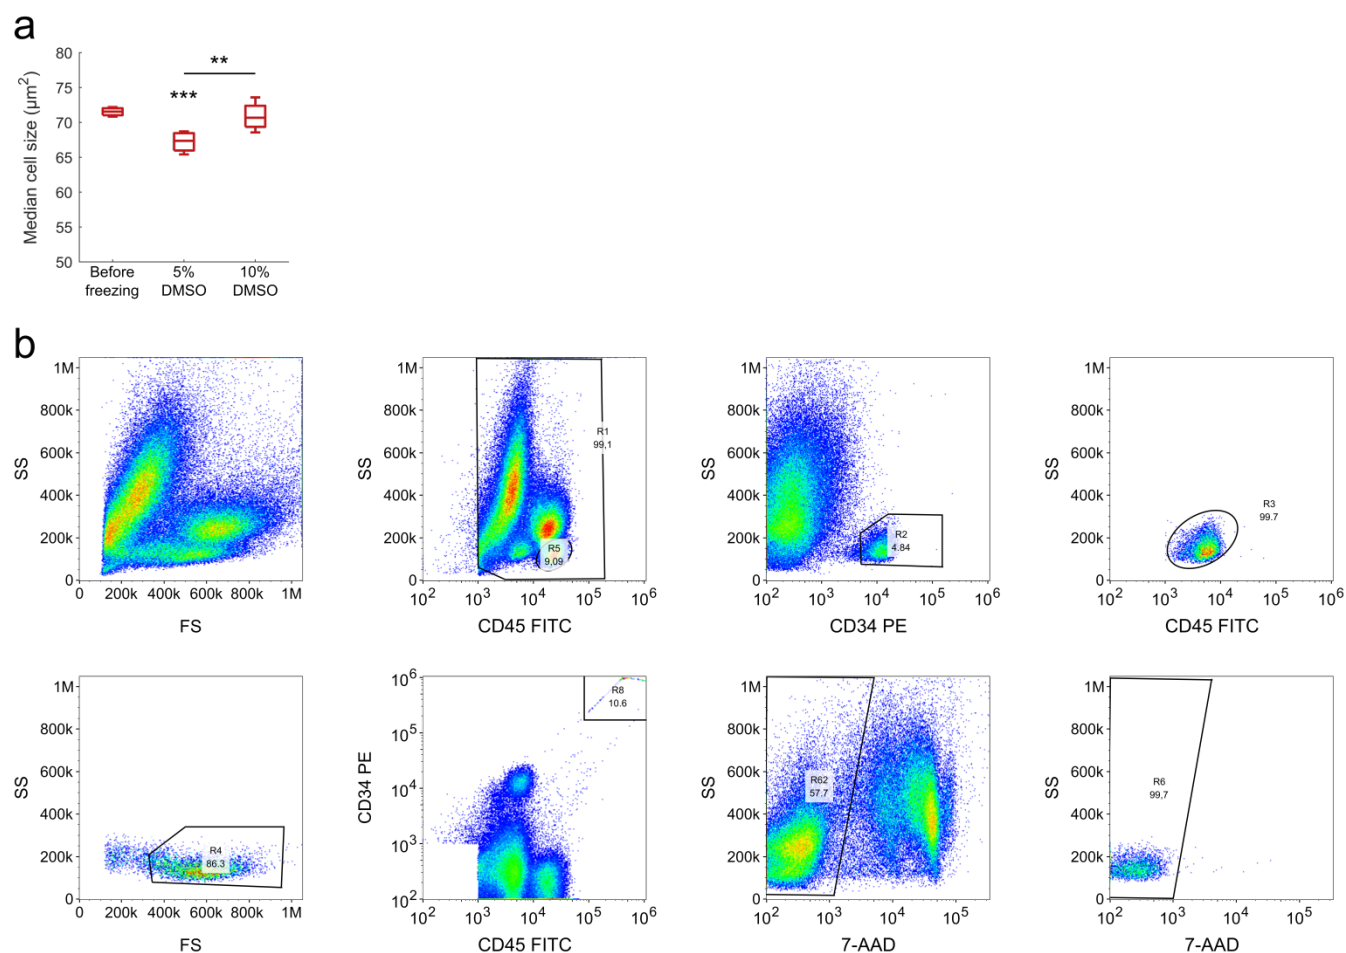

**Figure S2.** (a) Median cell size of hematopoietic stem cells before and after cryopreservation with 5 and 10% DMSO, (b) determination of CD34+, CD45+ cell count and viability using the ISHAGE protocol. DMSO=Dimethyl sulfoxide, FITC=fluorescein isothiocyanate, PE=phycoerythrin, 7-AAD=7-Amino actinomycin D
